# Supplementary material for: JUL1, Ring-Type E3 Ubiquitin Ligase, Is Involved in Transcriptional Reprogramming for ERF15-Mediated Gene Regulation
Source: Int J Mol Sci. 2023 Jan 4;24(2):987. doi: 10.3390/ijms24020987 (PMC9863049; doi:10.3390/ijms24020987)
Supplement: Supplementary file 1 [file ijms-24-00987-s001.zip › Table S1.xlsx]

## Sheet: 結果まとめ
Table S1. AlphaScreen-based binding intensity of transcription factors to JUL1.
AGI code	Annotation	Luminescence intensity*
at3g49850	MYB-like protein (TRB3)	289.804
at4g35700	DAZ3	247.185
at2g31230	ethylene reponse factor 15 (ERF15)	237.7
at4g34430	CHB3	222.208
at3g62420	bZIP53	196.439
at5g63450	WRKY33	190.735
at3g11440	MYB65	185.15
at1g06160	ORA59 (ERF59)	184.17
at1g14350	MYB124	182.022
at1g19490	bZIP62	178.494
at1g72650	MYB family transcription factor, TRF-LIKE 6, TRFL6	166.263
at5g07820	plant calmodulin-binding protein-like protein	148.53
at2g27230	LHW, LONESOME HIGHWAY	147.188
at5g48250	B-box type zinc finger protein, B-BOX DOMAIN PROTEIN 8, BBX8	145.517
at1g22190	RAP2.4	133.157
at2g04880	ZAP1	131.155
at3g02940	ATMYB107, MYB DOMAIN PROTEIN 107, MYB107	128.212
at1g49950	DNA-binding protein PcMYB1, putative	127.472
at5g01160	HAKAI	117.457
at5g60120	APETALA2 protein - like	116.704
at1g75390	bZIP transcription factor ATB2, putative	114.631
at2g46270	G-box binding bZIP transcription factor	110.733
at4g28140	ERF54, ETHYLENE RESPONSIVE FACTOR54	110.6
at1g64620	DOF1.8, VDOF2	107.731
at5g28770	seed storage protein - like	106.715
at5g11060	HOMEOBOX PROTEIN KNOTTED-1 LIKE 4 (KNAT4)	104.342
at2g03710	MADS-box protein (AGL3)	95.1898
at2g33880	encodes a protein with similarity to WUS type homeodomain protein	95.1501
at5g41570	WRKY24	93.0419
at5g60200	Encodes a Dof-type transcription factor, DOF5.3	90.5166
at3g53440	homeodomain-like superfamily protein	90.4967
at4g32980	homeobox gene ATH1	90.1545
at2g45190	YABBY1	88.5497
at1g70000	MYBD	88.3267
at2g44840	ERF13	87.585
at1g68840	RAV2	86.2936
at1g52150	ATHB15	83.5982
at2g31380	B-BOX DOMAIN PROTEIN 25, BBX25	82.7263
at1g18570	MYB51	78.894
at1g18330	EARLY-PHYTOCHROME-RESPONSIVE1	78.6887
at3g50700	ATIDD2, IDD2, INDETERMINATE(ID)-DOMAIN 2	77.9514
at4g25610	C2H2-like zinc finger protein	77.7859
at3g11100	EIN2 NUCLEAR ASSOCIATED PROTEIN 1, ENAP1, VFP3	76.5894
at5g54680	BASIC HELIX-LOOP-HELIX 105, BHLH105, IAA-LEUCINE RESISTANT3, ILR3	74.7483
at2g33550	homeodomain-like superfamily protein, ARABIDOPSIS SH4-RELATED3, ASR3	73.362
at2g37630	MYB91	72.9294
at5g12870	MYB46	72.4503
at1g43160	ERF113	70.596
at5g07690	MYB29	70.5055
at1g74430	MYB95	69.9603
at2g28550	putative AP2 domain transcription factor	67.2848
at3g07740	ADA2A, HOMOLOG OF YEAST ADA2 2A	67.0022
at1g66140	zinc finger protein, ZFP4	66.9934
at3g23690	basic helix-loop-helix (bHLH), CIB1 LIKE PROTEIN 2, CIL2	66.2958
at1g42990	BZIP60	65.7947
at5g67300	myb-related protein, 33.3K (pir||S71284)	62.8609
at4g17460	homeobox-leucine zipper protein HAT1 (hd-zip protein 1)	61.1921
at5g15150	homeobox-leucine zipper protein HAT7	60.6534
at1g09770	putative DNA-binding protein, Myb	60.4636
at4g36870	BEL1-like homeobox 2 protein (BLH2)	60.1479
at4g29190	putative protein	59.6556
at5g62470	MYB96 transcription factor-like protein	59.4327
at5g41020	putative protein	59.2583
at3g21270	Dof zinc finger protein	58.6203
at3g47600	putative transcription factor MYB94	56.7307
at2g36960	hypothetical protein	56.6115
at5g56860	putative protein	56.5055
at2g46590	putative DOF zinc finger protein	56.1126
at3g61970	RAV-like protein	56.0817
at1g30650	putative DNA-binding protein	55.9095
at3g51960	putative protein	55.064
at5g10280	putative transcription factor MYB92	54.8609
at5g52660	putative protein	54.8146
at5g08520	putative protein	54.7616
at4g38000	putative protein	53.8168
at2g23290	putative MYB family transcription factor	53.2914
at2g26580	hypothetical protein	53.2759
at3g03450	RGA1-like protein, RGL2	52.4481
at5g12850	zinc finger transcription factor -like protein	51.8852
at5g54230	Myb-related transcription factor-like protein	51.8675
at1g03840	putative DNA-binding protein	51.6689
at4g16610	hypothetical protein	51.5099
at3g57480	putative protein	50.9272
at5g06100	MYB family transcription factor-like	49.8013
at3g54340	floral homeotic protein APETALA3 (AP3)	48.8653
at1g19650	sec14 cytosolic factor, putative	48.5629
at5g15310	myb-related protein - like	47.66
at3g13810	zinc finger protein, putative	47.4923
at5g25390	AP2 domain containing protein	46.117
at3g04420	hypothetical protein	46.0684
at4g05100	MYB - like protein	45.8124
at5g25190	ethylene-responsive element - like protein	45.7815
at1g08290	hypothetical protein	45.7196
at5g04390	zinc finger transcription factor-like protein	44.9448
at4g36240	putative protein	43.8874
at4g23750	putative Ap2 domain protein	42.2075
at2g40950	putative TGACG-sequence-specific bZIP DNA-binding protein	42.0155
at5g22890	putative protein	41.9669
at2g27990	putative homeodomain transcription factor	41.7351
at1g72210	unknown protein	41.2406
at2g39250	putative AP2 domain transcription factor	41.117
at3g50060	R2R3-MYB transcription factor	41.1082
at4g34530	putative protein	40.7925
at1g18710	hypothetical protein	40.5916
at1g51140	hypothetical protein	40.5276
at1g08810	putative transcription factor	40.4945
at1g71030	putative transcription factor	38.7616
at4g12240	hypothetical proteins	38.3996
at2g41040	hypothetical protein	38.1832
at1g10820	hypothetical protein	37.8918
at5g44080	putative protein	37.8079
at3g57800	putative protein	37.5938
at5g66770	SCARECROW gene regulator	37.3951
at2g40620	putative bZIP transcription factor	37.2185
at5g10030	transcription factor OBF4	37.2009
at4g01720	putative DNA-binding protein	37.1611
at5g59450	scarecrow-like 11 - like	36.6137
at1g13450	hypothetical protein	36.223
at1g47860	hypothetical protein	34.8896
at5g06960	transcription factor HBP-1b (gb|AAD24395.1)	34.4879
at2g46680	homeodomain transcription factor (ATHB-7)	34.2296
at5g03780	myb -like protein	34.0464
at2g29660	unknown protein	33.9382
at1g26260	bHLH transcription factor GBOF-1, putative	33.8212
at1g26960	putative DNA-binding protein	33.2892
at3g50650	scarecrow-like 7 (SCL7)	32.5408
at3g44460	bZIP transcription factor -like protein	32.1766
at4g24470	putative protein	32.0375
at5g02840	putative protein	31.6821
at1g05230	putative ovule-specific homeotic protein	31.3907
at2g16400	putative homeodomain transcription factor	31.3532
at1g52880	NAM-like protein	31.2185
at5g06950	transcription factor HBP-1b homolog (sp|P43273)	31.1082
at1g28370	hypothetical protein	30.9139
at1g15360	putative ethylene responsive element	30.8675
at5g07100	SPF1-like protein	30.7616
at1g25440	hypothetical protein	29.3996
at4g17570	putative protein	29.0309
at5g16780	putative protein	28.9912
at3g55770	transcription factor L2	28.1876
at4g24240	putative DNA-binding protein	27.2693
at5g67580	putative protein	26.894
at3g01530	putative transcription factor	26.5386
at5g47390	Myb-related transcription activator-like	26.4371
at5g67450	Cys2/His2-type zinc finger protein 1 (dbj|BAA85108.1)	26.4305
at2g16770	hypothetical protein	26.3996
at3g46600	scarecrow-like protein	26.3157
at1g68920	putative DNA-binding protein	26.2583
at4g35040	putative protein	26.0751
at5g59430	telomere repeat-binding protein	25.7108
at2g36480	hypothetical protein	25.6733
at1g66350	gibberellin regulatory protein, putative	25.1501
at4g18170	DNA binding-like protein	24.9382
at3g06590	unknown protein	24.4503
at5g61600	DNA binding protein - like	24.4305
at1g68550	putative AP2 domain transcription factor	24.362
at5g66730	zinc finger protein	23.6623
at3g56850	promoter-binding factor-like protein	23.4901
at1g66470	hypothetical protein	23.2318
at5g04760	I-box binding factor-like protein	23.2185
at5g37890	putative protein	22.4327
at1g74930	putative AP2 domain transcription factor	22.3951
at4g17780	MYB transcription factor like protein	22.3444
at4g27310	putative protein	21.9823
at5g48560	putative protein	21.8102
at3g45610	dof6 zinc finger protein	21.6137
at2g43010	unknown protein,PIF4	21.1015
at1g30970	F17F8.14	21.053
at5g04340	putative c2h2 zinc finger transcription factor	20.713
at1g54160	hypothetical protein	20.543
at1g06850	b-Zip DNA binding protein, putative	20.4901
at2g47210	hypothetical protein	20.1921
at4g01460	putative bHLH DNA-binding protein	20.1015
at1g47870	transcription factor, putative	19.9161
at1g59640	ZCW32 helix-loop-helix protein - like	19.8013
at3g47640	hypothetical protein	19.1766
at1g06170	hypothetical protein	18.9051
at1g13260	hypothetical protein	18.8808
at3g23240	ethylene response factor 1	18.8389
at3g10800	putative bZIP transcription factor	18.7881
at2g46830	MYB-related transcription factor (CCA1)	18.5298
at5g58900	I-box binding factor - like protein	18.3466
at5g64750	putative protein	17.9095
at1g21450	scarecrow-like 1	17.3201
at3g59060	putative protein	17.2252
at5g62610	putative protein	16.6799
at1g76890	hypothetical protein	16.6336
at5g40710	zinc finger - like protein	16.5033
at2g34720	putative CCAAT-binding transcription factor subunit	16.298
at3g45260	zinc finger protein	16.0949
at1g73410	encodes a putative transcription factor that is a member of the R2R3-MYB family	16.0861
at4g01120	GBF2, G-box binding factor	16.0795
at2g02070	putative C2H2-type zinc finger protein	15.8035
at5g14370	putative protein	15.5607
at5g65640	unknown protein	15.5055
at1g49720	abscisic acid responsive elements-binding factor	15.1479
at3g58120	putative protein	15.0508
at4g33880	putative protein	15
at4g04890	putative homeotic protein	14.6887
at5g07580	transcription factor-like protein (emb|CAB87947.1)	14.5408
at2g20880	AP2 domain transcription factor	14.3996
at2g31210	hypothetical protein	14.2208
at1g03970	G-box binding factor, GBF4	13.9183
at1g73830	putative helix-loop-helix DNA-binding protein	13.6225
at2g41070	putative bZIP transcription factor	13.5364
at1g50420	scarecrow-like 3	13.1965
at3g11280	hypothetical protein	13.1766
at5g57620	Myb-related transcription factor-like protein	13.0088
at4g36990	heat shock transcription factor HSF4	12.9514
at1g01060	DNA-binding protein, putative	12.5033
at2g47260	putative WRKY-type DNA binding protein	12.4967
at1g64380	AP2-containing DNA-binding protein	12.4658
at1g22640	putative myb-related transcription factor	12.362
at4g17490	ethylene responsive element binding factor-like protein	12.245
at3g16350	putative MYB family transcription factor	11.936
at3g60630	scarecrow - like protein	11.83
at4g21440	myb-related protein M4	11.8035
at1g06070	transcriptional activator RF2a, putative	11.7638
at5g15830	bZIP DNA-binding protein-like	11.6623
at3g28910	MYB family transcription factor (hsr1), putative	11.4967
at1g07530	transcription factor scarecrow-like 14, putative	11.4901
at1g19430	unknown protein	11.4194
at1g15720	hypothetical protein	11.3355
at4g32040	homeodomain containing protein 1	11.1479
at2g31220	unknown protein	11.053
at1g04240	putative auxin-induced protein AUX2-11	11.0132
at2g38090	putative MYB family transcription factor	10.8212
at1g53910	Encodes a member of the ERF (ethylene response factor), ERF74	10.8013
at5g57150	putative protein	10.7417
at4g36900	TINY-like protein	10.532
at1g08000	GATA transcription factor 3, putative	10.3179
at5g63280	unknown protein	10.245
at3g01220	putative homeobox-leucine zipper protein, HAT7	10.1788
at4g32890	putative protein	10.0596
at3g47500	H-protein promoter binding factor-2a	9.97572
at4g34340	hypothetical protein	9.88742
at1g69780	homeobox gene 13 protein	9.74393
at5g08130	myc-like protein	9.70861
at1g09710	hypothetical protein	9.64018
at1g16060	Encodes ADAP, an AP2-domain protein that interacts with ARIA.	9.60265
at3g16870	hypothetical protein	9.5298
at2g44940	putative AP2 domain transcription factor	9.48344
at3g20310	ethylene responsive element binding factor, putative	9.45916
at5g51190	putative protein	9.31126
at3g12560	hypothetical protein	9.30684
at1g08010	GATA transcription factor 3, putative	9.27373
at5g26660	transcription factor ATMYB4	9.23841
at1g79840	homeobox protein (GLABRA2)	9.1479
at1g12610	hypothetical protein	8.89183
at1g34370	zinc finger protein, putative	8.80132
at1g32150	G-Box binding protein, putative	8.56733
at2g33500	putative CONSTANS-like B-box zinc finger protein	8.34216
at1g26580	hypothetical protein	8.31567
at2g24790	CONSTANS-like B-box zinc finger protein	8.31347
at1g75710	unknown protein	8.17439
at5g61590	ethylene responsive element binding factor - like	8.09934
at4g37260	myb-related protein	8.04194
at5g65410	putative protein	7.95143
at5g65310	homeobox-leucine zipper protein ATHB-5 (HD-zip protein ATHB-5) (sp|P46667)	7.93157
at4g37650	putative protein	7.6777
at3g15210	ethylene responsive element binding factor 4	7.55408
at4g38900	putative protein	7.03532
at1g75240	hypothetical protein	6.98675
at5g60890	Myb transcription factor homolog (ATR1)	6.81898
at1g03040	putative lipoamide dehydrogenase	6.79029
at3g48670	putative protein	6.56071
at1g58220	hypothetical protein	6.52759
at3g23210	unknown protein	6.18322
at4g16430	transcription factor like protein	6.14349
at1g51700	hypothetical protein	6.13907
at3g01470	homeobox-leucine zipper protein HAT5 (HD-ZIP protein 5) (HD-ZIP protein ATHB-1)	5.99338
at1g72830	hypothetical protein	5.90728
at1g01260	transcription factor MYC7E, putative	5.88521
at5g16600	transcription factor (gb|AAD53095.1)	5.73731
at1g21700	putative transcriptional regulatory protein	5.62031
at3g12820	myb-related protein, putative	5.4989
at1g08970	putative transcription factor	5.35099
at4g01250	putative DNA-binding protein	5.24945
at3g61150	homeobox protein	5.03532
at2g38470	putative WRKY-type DNA binding protein	5.02649
at3g19860	putative myc-like DNA-binding protein	4.95143
at4g23810	putative protein	4.95143
at5g28300	GTL1 - like protein	4.93157
at2g13710	pseudogene	4.92715
at1g19000	hypothetical protein	4.883
at2g03470	putative MYB family transcription factor	4.80132
at4g24660	putative protein	4.78587
at3g04670	unknown protein	4.64459
at1g43700	VirE2-interacting protein VIP1	4.60927
at5g59820	zinc finger protein Zat12	4.52318
at4g32800	transcription factor TINY homolog	4.50993
at4g09460	DNA-binding protein	4.50993
at3g02790	unknown protein	4.36203
at1g17440	hypothetical protein	4.25166
at5g60690	REVOLUTA or interfascicular fiberless 1	4.21634
at4g21340	hypothetical protein	4.08168
at4g36930	putative protein,SPATULA(SPT)	4.07064
at5g06710	putative protein	4
at4g16780	DNA-binding homeotic protein Athb-2	3.97351
at4g18880	heat shock transcription factor - like protein	3.92494
at1g61110	NAC transcription factor family, NAC25	3.89625
at5g15800	MADS box protein AGL2	3.84768
at2g24430	NAM (no apical meristem)-like protein	3.68874
at5g67060	putative protein	3.65784
at2g41130	unknown protein	3.50773
at1g54830	hypothetical protein	3.42384
at2g42380	unknown protein	3.39514
at2g18300	hypothetical protein	3.33554
at2g33610	putative SWI/SNF complex subunit SW13	3.26049
at3g18100	putative MYB family transcription factor	3.18322
at3g53200	MYB27 protein	3.13907
at3g55980	putative protein	3.09713
at4g31550	putaive DNA-binding protein	3.06181
at3g26745	putative transcriptional activator, 3' partial	3.05519
at3g25730	AP2 domain transcription factor	2.96689
at5g53980	unknown protein	2.95143
at1g53170	putative ethylene response element binding factor 4 gb|AAF34830.1	2.90066
at3g05760	hypothetical protein	2.88962
at1g54060	hypothetical protein	2.86313
at3g12720	myb-related transcription factor, putative	2.8543
at2g35940	putative homeodomain transcription factor	2.8521
at1g68810	putative DNA-binding protein	2.78366
at2g34710	homeodomain transcription factor (ATHB-14)	2.77925
at1g21200	hypothetical protein	2.73951
at4g27410	putative protein	2.72406
at1g72360	putative AP2 domain transcription factor	2.6777
at5g54070	putative protein	2.67108
at5g65320	putative protein	2.67108
at5g18270	NAM (no apical meristem)-like protein	2.66004
at3g15500	putative jasmonic acid regulatory protein	2.6181
at2g02080	putative C2H2-type zinc finger protein	2.56512
at5g51780	putative protein	2.53863
at5g22570	putative protein	2.53863
at2g30470	putative VP1/ABI3 family regulatory protein	2.52097
at1g19850	hypothetical protein	2.49448
at5g19310	homeotic gene regulator - like protein	2.49227
at3g15510	putative jasmonic acid regulatory protein	2.49007
at1g61660	hypothetical protein	2.4128
at4g29930	putative protein	2.37528
at1g56010	NAC1	2.37307
at3g21330	hypothetical protein	2.36424
at3g20640	hypothetical protein	2.33113
at3g25710	putative HLH DNA-binding protein	2.32009
at1g68640	transcription factor PERIANTHIA	2.32009
at4g35550	homeodomain - like protein	2.30243
at1g68520	putative B-box zinc finger protein	2.29139
at3g06740	hypothetical protein	2.29139
at3g58680	transcriptional coactivator - like protein	2.234
at2g20180	unknown protein,PIL5	2.21854
at4g30400	putative protein	2.19868
at3g60390	homeobox-leucine zipper protein HAT3	2.18764
at1g25560	hypothetical protein	2.18322
at2g41710	putative AP2 domain transcription factor	2.17881
at5g15160	putative protein	2.16998
at1g74500	putative DNA-binding protein	2.14349
at3g48590	transcription factor Hap5a	2.13245
at3g50260	putative protein	2.13245
at3g58070	zinc finger-like protein	2.11479
at2g27470	putative CCAAT-binding transcription factor subunit	2.09713
at5g49520	putative protein	2.09492
at3g60030	squamosa promoter binding protein-like 12	2.09051
at3g57600	AP2 transcription factor - like protein	2.05077
at3g25890	unknown protein	2.04415
at4g00150	putative scarecrow-like protein	2.01766
at4g29100	putative protein	2.00883
at1g55040	hypothetical protein	2
at5g47670	putative protein	1.99779
at5g24800	transcription factor-like protein	1.98675
at1g69120	hypothetical protein	1.93819
at2g46310	putative AP2 domain transcription factor	1.93819
at3g02310	floral homeotic protein AGL4	1.93157
at5g24590	NAC2-like protein	1.9117
at4g16150	transcription factor like protein	1.90949
at2g23340	putative AP2 domain transcription factor	1.8543
at4g11660	heat shock transcription factor - like protein	1.84547
at1g75370	sec14 cytosolic factor, putative	1.81678
at1g69180	transcription factor CRC	1.81457
at2g30590	unknown protein	1.81457
at1g01720	NAC domain protein, putative	1.77483
at1g28360	hypothetical protein	1.73731
at2g38340	DREB-like AP2 domain transcription factor	1.7351
at5g17810	putative protein	1.72848
at3g02380	hypothetical protein	1.72185
at3g14230	DNA-binding protein	1.71744
at5g47640	putative protein	1.68433
at4g02020	polycomb group - like protein	1.6777
at5g41410	homeotic protein BEL1 homolog	1.67329
at2g23760	putative homeodomain transcription factor	1.66446
at3g48530	putative protein	1.65342
at5g12840	CCAAT box binding factor/ transcription factor Hap2a	1.60927
at2g19640	putative SET-domain transcriptional regulator	1.60927
at2g23320	putative WRKY-type DNA-binding protein	1.60706
at4g00050	putative transcriptional regulator	1.59161
at3g05690	putative transcription factor	1.59161
at2g14220	pseudogene	1.56733
at3g56220	putative protein	1.56733
at1g13880	hypothetical protein	1.55188
at4g36710	SCARECROW-like protein	1.54084
at2g28510	putative DOF zinc finger protein	1.54084
at1g19700	hypothetical protein	1.53863
at4g17500	ethylene responsive element binding factor 1 (frameshift !)	1.5298
at2g46130	putative WRKY-type DNA binding protein	1.52539
at2g42280	unknown protein	1.51876
at5g43650	putative protein	1.51214
at2g38880	putative CCAAT-binding transcription factor subunit	1.50773
at1g10610	similar to PDR5-like ABC transporter emb|CAA94437	1.50552
at2g03340	putative WRKY DNA-binding protein	1.50552
at2g01570	putative RGA1, giberellin repsonse modulation protein,	1.50331
at5g09330	putative protein	1.49448
at2g16720	putative MYB family transcription factor	1.48344
at1g10200	putative transcription factor	1.47682
at5g17490	RGA-like protein,RGL3	1.47682
at2g46400	putative WRKY-type DNA binding protein	1.47682
at1g62990	homeodomain-containing protein HD1, putative	1.46578
at2g22430	homeodomain transcription factor (ATHB-6)	1.45033
at3g10500	unknown protein	1.44592
at2g47620	putative SWI/SNF family transcription activator	1.43929
at5g46350	putative protein	1.43267
at4g17230	scarecrow-like 13 (SCL13)	1.42605
at3g49530	NAC2-like protein	1.42605
at3g57670	zinc finger - like protein	1.41501
at4g31420	putative zinc finger protein	1.40839
at5g59780	MYB27 protein - like	1.38631
at4g02640	putative protein	1.37969
at4g01550	putative NAM-like protein	1.37086
at5g24110	unknown protein	1.36645
at1g30500	transcription factor, putative	1.3532
at5g62940	Dof zinc finger protein - like	1.34879
at3g20910	CCAAT-binding factor B chain, putative	1.34879
at5g15850	CONSTANS-like 1	1.32671
at1g14920	signal response protein (GAI)	1.32671
at4g38620	putative transcription factor (MYB4)	1.32671
at4g37750	ovule development protein aintegumenta (ANT)	1.3223
at5g63470	transcription factor Hap5a-like protein	1.31347
at1g77450	GRAB1-like protein	1.29801
at4g20280	putative protein	1.28918
at2g22210	pseudogene	1.28256
at1g55110	hypothetical protein	1.27152
at5g61430	NAM, no apical meristem, - like protein	1.2649
at1g73360	encodes a homeobox-leucine zipper family protein belonging to the HD-ZIP IV family	1.25607
at2g24570	putative WRKY-type DNA binding protein	1.24503
at1g78080	putative AP2 domain containing protein RAP2.4	1.2362
at1g06040	salt-tolerance protein	1.234
at5g13180	NAM-like protein	1.23179
at5g42480	putative protein	1.22517
at1g24630	zinc finger protein 7, ZFP7	1.22075
at1g27730	salt-tolerance zinc finger protein	1.21192
at5g16470	putative protein	1.21192
at5g37260	putative protein	1.2053
at5g22290	NAM (no apical meristem)-like protein	1.20309
at1g78600	hypothetical protein	1.20088
at5g45050	disease resistance protein-like	1.19868
at5g08140	putative protein	1.19426
at5g15840	CONSTANS	1.19426
at5g65210	DNA binding protein TGA1a homolog	1.18543
at1g50600	scarecrow-like protein	1.18543
at1g36060	putative AP2 domain containing protein RAP2.4 gi|2281633	1.18322
at4g14540	CCAAT-binding transcription factor subunit A(CBF-A)	1.17881
at2g33860	auxin response transcription factor 3 (ETTIN/ARF3)	1.1766
at5g13820	H-protein promoter binding factor-1 (gb|AAC24592.1)	1.15453
at5g64530	putative protein	1.1479
at5g08190	DR1-like protein	1.14349
at2g22800	homeodomain transcription factor (HAT9)	1.12362
at5g13080	WRKY-like protein	1.11038
at5g25160	ZFP3 zinc finger protein	1.10817
at5g24930	putative protein	1.10375
at3g54620	bZIP transcription factor -like protein	1.10155
at1g07980	hypothetical protein	1.10155
at1g34190	putative protein	1.09713
at1g67030	hypothetical protein	1.0883
at4g02590	hypothetical protein	1.08609
at1g79700	hypothetical protein	1.08389
at3g20770	ethylene-insensitive 3	1.08168
at1g25580	hypothetical protein	1.08168
at5g44190	putative protein	1.08168
at4g04800	putative protein	1.07506
at4g21750	L1 specific homeobox gene ATML1/ovule-specific homeobox protein A20	1.06843
at2g46770	NAM (no apical meristem)-like protein	1.06402
at4g26640	putative protein	1.0574
at1g73230	nascent polypeptide-associated complex NAC	1.04636
at4g34000	bZIP transcription factor - like protein	1.04415
at3g19580	zinc finger protein, putative	1.04194
at1g52890	NAM-like protein	1.03753
at1g48000	myb-related transcription factor (cpm10), putative	1.03753
at1g50640	ethylene responsive element binding factor 3	1.03311
at2g33710	putative AP2 domain transcription factor	1.02428
at1g72050	hypothetical protein	1.01766
at2g36270	putative bZIP transcription factor	1.01325
at4g34680	GATA transcription factor 3	1
at3g24870	hypothetical protein	0.99117
at2g01650	unknown protein	0.986755
at5g66320	GATA-binding transcription factor-like protein	0.975717
at4g18020	putative protein	0.97351
at5g60450	auxin response factor 4	0.971302
at4g36540	putative protein	0.966887
at3g62240	putative zinc-finger protein	0.96468
at1g17880	hypothetical protein	0.960265
at2g22850	putative embryo-abundant protein	0.958057
at5g57660	CONSTANS-like B-box zinc finger protein-like	0.958057
at5g05410	DREB2A (dbj|BAA33794.1)	0.95585
at1g72740	putative DNA-binding protein	0.953642
at3g44750	putative histone deacetylase	0.949227
at5g11260	HY5	0.94702
at4g34590	bZIP transcription factor ATB2	0.944812
at1g77950	similar to TDR8 protein pir|S23732	0.944812
at5g47230	ethylene responsive element binding factor 5 (ATERF5) (sp|O80341)	0.944812
at1g56170	transcription factor, putative	0.940397
at1g30490	HD-Zip protein	0.940397
at2g36930	unknown protein	0.93819
at3g57230	MADS-box transcription factor-like protein	0.924945
at1g07520	transcription factor scarecrow-like 14, putative	0.924945
at1g74840	putative MYB family transcription factor	0.918322
at3g07565	unknown protein, 3' partial	0.9117
at4g08150	KNAT1 homeobox-like protein	0.909492
at5g49450	putative protein	0.907285
at5g04410	putative protein	0.907285
at5g23090	TATA-binding protein-associated phosphoprotein Dr1 protein homolog (sp|P49592)	0.907285
at5g63790	putative protein	0.905077
at1g14440	hypothetical protein	0.905077
at4g00730	homeodomain protein AHDP	0.90287
at3g60580	zinc finger protein - like	0.90287
at2g38260	pseudogene; similar to GB:U34392	0.900662
at3g54460	RING finger -like protein	0.898455
at4g37790	homeobox protein HAT22	0.898455
at5g65050	MADS box transcription factors-like protein	0.896247
at2g45160	putative SCARECROW gene regulator	0.896247
at3g52920	putative protein	0.89404
at2g22540	putative MADS-box protein	0.891832
at5g38590	putative protein	0.889625
at2g45660	MADS-box protein (AGL20)	0.889625
at2g26530	AR781, similar to yeast pheromone receptor	0.889625
at2g46510	putative bHLH transcription factor	0.887417
at5g65790	transcription factor-like protein	0.887417
at4g34410	putative protein	0.88521
at5g26870	putative protein	0.880795
at3g24880	hypothetical protein	0.880795
at4g36730	G-box-binding factor 1	0.874172
at4g01680	putative transcription factor	0.871965
at1g17920	hypothetical protein	0.871965
at2g47460	putative MYB family transcription factor	0.869757
at5g14000	unknown protein	0.869757
at1g59750	hypothetical protein	0.869757
at4g04830	putative protein	0.86755
at1g77080	Similar to 'MADS box' transcription factors	0.865342
at3g47620	putative protein	0.85872
at2g45050	putative GATA-type zinc finger transcription factor	0.856512
at5g44160	putative protein	0.856512
at3g56400	DNA-binding protein-like	0.854305
at5g52510	SCARECROW transcriptional regulator-like	0.847682
at2g22710	hypothetical protein	0.845475
at5g18230	putative protein	0.84106
at1g09540	putative transcription factor	0.836645
at4g01060	putative myb-like protein	0.83223
at4g30080	transcription factor-like protein	0.830022
at1g62300	hypothetical protein	0.827815
at4g36060	putative Myc-type transcription factor	0.825607
at3g01970	putative WRKY-like transcriptional regulator protein	0.821192
at5g47370	homeobox-leucine zipper protein-like	0.821192
at1g60670	hypothetical protein (DUF3755)	0.821192
at5g25220	KNAT3 homeodomain protein	0.807947
at2g47810	putative CCAAT-box binding trancription factor	0.801325
at3g61890	homeobox-leucine zipper protein ATHB-12	0.790287
at3g46590	telomere repeat-binding protein homolog	0.779249
at2g21650	unknown protein	0.777042
at5g60910	MAD box containing protein NAP1-1 - like	0.752759
at2g25000	putative WRKY-type DNA binding protein	0.569536
Data represent the mean of two replications.
*Luminescence intensities were normalized by those of Escherichia coli dihydrofolate reductase.
