# Supplementary material for: JUL1, Ring-Type E3 Ubiquitin Ligase, Is Involved in Transcriptional Reprogramming for ERF15-Mediated Gene Regulation
Source: Int J Mol Sci. 2023 Jan 4;24(2):987. doi: 10.3390/ijms24020987 (PMC9863049; doi:10.3390/ijms24020987)
Supplement: Supplementary file 1 [file ijms-24-00987-s001.zip › Table S2.xlsx]

## Sheet: Sheet1
Table S2. Primers.					Rmarks
Purpose	Gene/clone/plasmid	Gene ID	Forward primer sequence (5′ to 3′)	Reverse primer sequence (5′ to 3′)
Gene cloning	TRB3 (JiTF1)	At3g49850	ATGGGAGCTCCAAAGCTGAAGTG	TTACCGAGTTTGGCTATGCATT
	DAZ3 (JiTF2)	At4g35700	ATGAGTAATCCCGAGAAGTCTA	TCACTCGACTTTATCATCGTT
	ERF15 (JiTF3)	At2g31230	ATGGAATATTCCCAATCTTCC	TCAACATGAGCTCATAAGAAGTT
	CHB3 (JiTF4)	At4g34430	ATGGAGGAAAAACGACGCGA	CTAAACCGAAGAAACATTGTC
	bZIP53 (JiTF5)	At3g62420	ATGGGGTCGTTGCAAATG	TCAGCAATCAAACATATCAGC
	MYB65 (JiTF6)	At3g11440	ATGAGTTACACGACGGCGAC	TTACAGCGACCAAACAGGAGGCA
	ORA59 (JiTF7)	At1g06160	ATGGAATATCAAACTAACTTC	TCAAGAACATGATCTCATAAG
	MYB124 (JiTF8)	At1g14350	ATGGAAGATACGAAGAAGAAAAAG	TTACAAGCTATGGAGAAGGACTCT
	bZIP62 (JiTF9)	At1g19490	ATGGAGTTGGAGCCTATATCA	TTATCCGACCTGCATCCGACA
	JUL1	At5g10650	CCACCCACCACCACCAATGGATGGATGTGCTGGTAA	TCCAGCACTAGCTCCAGAAATCGACTTCTCTTCTTCCG	without stop codon, Underline: S1 or T1-linker sequence
	JAV1	At3g22160	CCACCCACCACCACCAATGGCTAACCCCAACGAGT	TCCAGCACTAGCTCCAGATTGCAACCTCGAAGAAGAAG	without stop codon, Underline: S1 or T1-linker sequence
	pDONRzeo_cloning_2nd PCR		GGGGACAAGTTTGTACAAAAAAGCAGGCTTCCACCCACCACCAATG	GGGGACCACTTTGTACAAGAAAGCTGGGTCTCCAGCACTAGCTCCAGA	Underline: S1 or T1-linker sequence
	ERF15 (JiTF3)			ACATGAGCTCATAAGAAGTT	without stop codon
	bZIP53 (JiTF5)			GCAATCAAACATATCAGC	without stop codon
	ORA59 (JiTF7)			AGAACATGATCTCATAAG	without stop codon
	JAZ8	At1g30135	ATGAAGCTACAGCAAAATTGTGAC	TCGTCGTGAATGGTACGGTGA	without stop codon
	GFP		ATGAGTAAAGGAGAAGAACT	TTTGTATAGTTCATCCATGC	without stop codon
Promoter region cloning	GEA6	At2g40170	CCTGGCAAAATTTAGTGAATTC	TACACAACACAAGTTTATATAAAACACTAG
	PDF1.2	At5g44420	TTATAATGTTCGGTTTTTCC	TATTTCTTCACACAACAC
Cell-free protein synthesis	pEU-6×His-bls-GW, pEU-GW-FLAG, pEU-GW-AGIA		GCGTAGCATTTAGGTGACACT	CCTGCGCTGGGAAGATAAAC
RT-qPCR	TRB3 (JiTF1)		ATGAAACGGCTTGTGACTTCAAGG	AGTTGAGGAGACCTTTGTCCTTCTC
	DAZ3 (JiTF2)		AAGTGCTAGTGGTACCGGTGAC	TAGGGGTACAACCAGATGCTTCG
	ERF15 (JiTF3)		CGAGGAATGGAATTAGGGTTTGGC	ACCGGGAAATTAAGTGTTGCAAGA
	CHB3 (JiTF4)		GATTGGCAGGATCTGATGTTGCTAC	GTTGGATCCTTCTTGTTGTCTGGTG
	bZIP53 (JiTF5)		GATGCCTTGTCCAATGCAAC	AAGATTGCGTTGTCCATTGA
	MYB65 (JiTF6)		TTGTTAGTGACACAAGCAGCATGAG	ATAAGACCCCGACGCCTCGTG
	ORA59 (JiTF7)		CAATTTCCCCGCGGATGTCG	CCTCTAGGACGGTTTCTCATGGAG
	MYB124 (JiTF8)		CCTATTCAGGTCACGCCATTGTTC	TAGCACTTGGACATGGAGATGAGG
	bZIP62 (JiTF9)		CCTGATCACAGCAATGGTGTTCC	CCATCGGTCTTGCAGAAGAATCATC
	JUL1		GAGATATGAGGCTTGACATCGAT	AAGGCTTCTTGAGAGTGCTTCTT
	JAV1		GCAACGGCCTTACATGTTTT	TCGTAGCCTCCTTTGACGAC
	PDF1.2	At5g44420	CCAAGTGGGACATGGTCAG	ACTTGTGTGCTGGGAAGACA
	GEA6	At2g40170	AAGCTCAACAGCATCTCGCT	TGCTAAGACCACCTTTGCGT
	ACT8	At1g49240	TGCTGGTCGTGACCTTACTG	CGAGGTCTCCATCTCTTGCT
RT-qPCR for	ERF15 (JiTF3)		GGAGGAATGGAATTAGGGTTTGGC	ACCGGGAAATTAAGTGTTGCAAGAG
Arabidopsis mutant samples	bZIP53 (JiTF5)		GATGCCTTGTCCAATGCAAC	AAGATTGCGTTGTCCATTGA
	ORA59 (JiTF7)		CAATTTCCCCGCGGATGTCG	CCTCTAGGACGGTTTCTCATGGAG
SALK or GK line genotyping	ERF15 (JiTF3)		TAAGCGGGTCCTAAAATCGAG	CTATATATATAAGAGACACGGAA
	bZIP53 (JiTF5)		ATGGGGTCGTTGCAAATG	AATAAGAAAGCTTGAATTCAATAA
	ORA59 (JiTF7)		ATGGAATATCAAACTAACTTC	TCAAGAACATGATCTCATAAG
	LBb1-3		ATTTTGCCGATTTCGGAAC
	GABI		ATAATAACGCTG CGGACATCTACATTTT
